# Professional Practice Committee for the 2014 Clinical Practice Recommendations

## Committee members disclosed the following financial or other conflicts of interest covering the period 12 months before 7 September 2013

| Member                                    | Employment                                                                                                      | Research grant                                                                                   | Other research support                                                                                          |
|-------------------------------------------|-----------------------------------------------------------------------------------------------------------------|--------------------------------------------------------------------------------------------------|-----------------------------------------------------------------------------------------------------------------|
| Richard W. Grant, MD, MPH (Chair)         | Division of Research, Kaiser Permanente, Oakland, CA                                                            | AHRQ#, NIDDK#                                                                                    | None                                                                                                            |
| Nathaniel G. Clark, MD, MS, RD            | Endocrinology and Diabetes, Jordan Hospital, Plymouth, MA                                                       | None                                                                                             | None                                                                                                            |
| Cyrus V. Desouza, MBBS                    | University of Nebraska Medical Center and Omaha VA Medical Center, Omaha, NE                                    | NIDDK#, Novo Nordisk#, Asahi Kasei Pharma America#                                               | None                                                                                                            |
| Martha M. Funnell, MS, RN, CDE            | University of Michigan, Ann Arbor, MI                                                                           | None                                                                                             | None                                                                                                            |
| Allison B. Goldfine, MD                   | Joslin Diabetes Center, Boston, MA; Special Government Employee                                                 | NIDDK#, NHLBI#, ADA#, Daiichi Sankyo#, Merck (site investigator)                                 | Research supplies from Caraco Pharmaceuticals#, LifeScan#, Mercodia#, Nestlé#, Amneal#, Novo Nordisk#, MiniMed# |
| Lori Laffel, MD, MPH                      | Joslin Diabetes Center and Harvard Medical School, Boston, MA                                                   | Bayer#, NIH#, NIDDK#, NICHD#, T1D Exchange                                                       | None                                                                                                            |
| Jennifer B. Marks, MD                     | Miami VA, Miami, FL, and Diabetes Research Institute, University of Miami, Miller School of Medicine, Miami, FL | Lilly#, NIH#, NIDDK#, T1D Exchange Clinic Registry#                                              | NIDDK                                                                                                           |
| Anthony L. McCall, MD, PhD                | University of Virginia, Charlottesville, VA                                                                     | Sanofi#, Eli Lilly#, NIDDK#, LaunchPad (UVA internal grant)                                      | None                                                                                                            |
| Janis R. McWilliams, RN, MSN, CDE, BC-ADM | Consultant, Pittsburgh, PA                                                                                      | None                                                                                             | None                                                                                                            |
| Rodica Pop-Busui, MD, PhD                 | University of Michigan, Ann Arbor, MI                                                                           | Bristol-Myers Squibb#, NIDDK#, NHLBI#                                                            | None                                                                                                            |
| Neda Rasouli, MD                          | University of Colorado and VA Eastern Colorado Health Care System, Denver, CO                                   | Novo Nordisk#, Bristol-Myers Squibb#, Merck#, NIDDK#, Pfizer#                                    | None                                                                                                            |
| Henry Rodriguez, MD                       | University of South Florida, Tampa, FL                                                                          | NIH#, Bristol-Myers Squibb#, Daiichi Sankyo#, Novartis#, Novo Nordisk#, TrialNet, Helmsley Trust | None                                                                                                            |
| Debra L. Simmons, MD, MS                  | University of Utah, VA Salt Lake City Health Care System, Salt Lake City, UT                                    | NHLBI#                                                                                           | None                                                                                                            |
| Joseph Stankaitis, MD, MPH                | Monroe Plan for Medical Care, Pittsford, NY                                                                     | New York Health Foundation#, CDC#                                                                | None                                                                                                            |
| Patti Urbanski, MEd, RD, LD, CDE          | pbu consulting, LLC, Cloquet, MN                                                                                | None                                                                                             | None                                                                                                            |
| Judith Fradkin, MD (Ex officio)           | NIDDK, Bethesda, MD                                                                                             | None                                                                                             | None                                                                                                            |
| Jane Chiang, MD (Staff)                   | ADA, Alexandria, VA                                                                                             | None                                                                                             | None                                                                                                            |
| Stephanie Dunbar, MPH, RD (Staff)         | ADA, Alexandria, VA                                                                                             | None                                                                                             | None                                                                                                            |

\*≥\$10,000 per year from company to individual; #grant or contract is to university or other employer. AACE, American Association of Clinical Endocrinologists; ADA, American Diabetes Association; AHRQ, Agency for Healthcare Research and Quality; CDC, Centers for Disease Control and Prevention; DOH, Department of Health; DSMB, data and safety monitoring board; ITN, Immune Tolerance Network; NCQA, National Committee for Quality Assurance; NHLBI, National Heart, Lung, and Blood Institute; NICHD, National Institute of Child Health and Human Development; NIDDK, National Institute of Diabetes and Digestive and Kidney Diseases; NIH, National Institutes of Health; UVA, University of Virginia.

| Member  | Speakers' bureau/<br>honoraria                                                                             | Ownership<br>interest                                                               | Consultant/<br>advisory board                                                                                                                                                                                                                  | Other                                                                                                                                                                                                         |
|---------|------------------------------------------------------------------------------------------------------------|-------------------------------------------------------------------------------------|------------------------------------------------------------------------------------------------------------------------------------------------------------------------------------------------------------------------------------------------|---------------------------------------------------------------------------------------------------------------------------------------------------------------------------------------------------------------|
| R.W.G.  | None                                                                                                       | None                                                                                | None                                                                                                                                                                                                                                           | Deputy Editor, <i>Journal of General Internal Medicine</i>                                                                                                                                                    |
| N.G.C.  | Novo Nordisk,<br>Bristol-Myers<br>Squibb, Sanofi                                                           | None                                                                                | Novo Nordisk                                                                                                                                                                                                                                   | None                                                                                                                                                                                                          |
| C.V.D.  | None                                                                                                       | None                                                                                | Novo Nordisk, Takeda                                                                                                                                                                                                                           | None                                                                                                                                                                                                          |
| M.M.F.  | None                                                                                                       | None                                                                                | Eli Lilly, Halozyme Therapeutics,<br>Bristol-Myers Squibb/<br>AstraZeneca Diabetes,<br>Hygeia Inc., Boehringer<br>Ingelheim, GlaxoSmithKline,<br>Johnson & Johnson,<br>Animas/LifeScan, Intuity<br>Medical, Novo Nordisk,<br>Bayer Diagnostics | None                                                                                                                                                                                                          |
| A.B.G.  | None                                                                                                       | Pending patents:<br>JDP-106<br>(SAL-T2D);<br>JDP-109<br>(SAL-CVD);<br>JDP-129 (SRF) | None                                                                                                                                                                                                                                           | None                                                                                                                                                                                                          |
| L.L.    | None                                                                                                       | None                                                                                | Oshadi Administrative Devices, Eli Lilly,<br>Menarini, Johnson & Johnson, JDRF<br>(International Advisory Board),<br>Bristol-Myers Squibb, LifeScan,<br>Sanofi, Roche, Novo Nordisk,<br>Boehringer Ingelheim                                   | Section Editor, <i>UpToDate</i> ;<br>Associate Editor, <i>Diabetic<br/>Medicine</i> ; TrialNet/ITN DSMB<br>member, The Endocrine Society                                                                      |
| J.B.M.  | None                                                                                                       | None                                                                                | Amgen                                                                                                                                                                                                                                          | None                                                                                                                                                                                                          |
| A.L.M.  | None                                                                                                       | None                                                                                | Sanofi                                                                                                                                                                                                                                         | Clinical Science Chair, The Endocrine<br>Society's 2012 Annual Meeting;<br>AACE chapter author on<br>management of type 2 diabetes;<br>editorial board member, <i>Diabetic<br/>Hypoglycemia</i>               |
| J.R.M.  | Bristol-Myers<br>Squibb<br>(Steady Start<br>Educator<br>Network),<br>Healthy<br>Interactions,<br>Valeritas | None                                                                                | None                                                                                                                                                                                                                                           | Editorial board member, <i>Diabetes<br/>Forecast</i>                                                                                                                                                          |
| R.P.-B. | None                                                                                                       | None                                                                                | T1D Exchange; Janssen<br>Pharmaceuticals, Inc.;<br>AstraZeneca                                                                                                                                                                                 | Editorial board member, <i>Journal of<br/>Diabetes and its Complications and<br/>Experimental Diabetes Research</i>                                                                                           |
| N.R.    | None                                                                                                       | None                                                                                | None                                                                                                                                                                                                                                           | None                                                                                                                                                                                                          |
| H.R.    | None                                                                                                       | None                                                                                | Roche Diagnostics                                                                                                                                                                                                                              | JDRF Outreach Committee Member;<br>Merck#; spouse contracts with<br>Roche, Insulet, and Medtronic                                                                                                             |
| D.L.S.  | None                                                                                                       | None                                                                                | None                                                                                                                                                                                                                                           | None                                                                                                                                                                                                          |
| J.S.    | None                                                                                                       | None                                                                                | TPG National Payor<br>Roundtable; Amgen;<br>Celgene; Gilead;<br>Janssen Pharmaceuticals,<br>Inc.                                                                                                                                               | Institution provides grant to ADA NY<br>Chapter, NCQA (physician surveyor<br>and member of Reconsideration<br>Committee), NY State DOH Medicaid<br>Redesign Team's Evidence-Based<br>Benefit Review Workgroup |
| P.U.    | None                                                                                                       | None                                                                                | Eli Lilly; Medtronic; YourEncore<br>Network; Janssen<br>Pharmaceuticals, Inc.                                                                                                                                                                  | None                                                                                                                                                                                                          |
| J.F.    | None                                                                                                       | None                                                                                | None                                                                                                                                                                                                                                           | None                                                                                                                                                                                                          |
| J.C.    | None                                                                                                       | None                                                                                | None                                                                                                                                                                                                                                           | None                                                                                                                                                                                                          |
| S.D.    | None                                                                                                       | None                                                                                | None                                                                                                                                                                                                                                           | None                                                                                                                                                                                                          |
